# Supplementary material for: Protocol Development of a Personalized Balanced Nutrition Concept for Preschool Children, Primarily Those with Food Allergies, Using an IT Platform
Source: MDPI journal article supplement (doi:10.3390/medicina59081367), 2023-07-26
Supplement: s1 [file s1]

## Supplementary data for Miletić Gospić et al.

Table S1. List of all inhaled and food allergens used in standard SPT in participants

| Type of allergen | Allergen species                                                                   | Binomial nomenclature                                                                                                              |
|------------------|------------------------------------------------------------------------------------|------------------------------------------------------------------------------------------------------------------------------------|
| House dust       | House dust mite                                                                    | <i>Dermatophagoides farinae</i>                                                                                                    |
|                  |                                                                                    | <i>Dermatophagoides pteronyssinus</i>                                                                                              |
| Animal dander    | Cat dander                                                                         | <i>Felis domesticus</i>                                                                                                            |
|                  | Dog dander                                                                         | <i>Canis familiaris</i>                                                                                                            |
|                  | 5 grasses mix- cocksfoot, sweet vernal-grass, rye-grass, meadow grass, and timothy | <i>Dactylis glomerata</i> , <i>Anthoxanthum odoratum</i> , <i>Lolium perenne</i> , <i>Poa pratensis</i> and <i>Phleum pratense</i> |
|                  |                                                                                    |                                                                                                                                    |
| Weed pollen      | Common ragweed                                                                     | <i>Ambrosia elatior</i>                                                                                                            |
|                  | Mugwort                                                                            | <i>Artemisia vulgaris</i>                                                                                                          |
|                  | Lichwort                                                                           | <i>Parietaria officinalis</i>                                                                                                      |
| Tree pollen      | Common silver birch                                                                | <i>Betula verrucosa</i>                                                                                                            |
|                  | Hazel                                                                              | <i>Corylus avellana</i>                                                                                                            |
|                  | Olive                                                                              | <i>Olea europaea</i>                                                                                                               |
|                  | Pine                                                                               | <i>Pinus radiata</i>                                                                                                               |
|                  | Cypress                                                                            | <i>Cupressus sempervirens</i>                                                                                                      |
| Shrub pollen     | Mimosa                                                                             | <i>Mimosa pudica</i>                                                                                                               |
| Molds            | Alternaria                                                                         | <i>Alternaria alternata</i>                                                                                                        |
|                  | Cladosporium                                                                       | <i>Cladosporium herbarum</i> or spp.                                                                                               |
| Food allergens   | Whole egg                                                                          | <i>Gallus spp.</i>                                                                                                                 |
|                  | Cow`s milk                                                                         | <i>Bos spp.</i>                                                                                                                    |
|                  | Wheat flour                                                                        | <i>Triticum aestivum</i>                                                                                                           |
|                  | Corn flour                                                                         | <i>Zea mays</i>                                                                                                                    |
|                  | Soy                                                                                | <i>Glycine max</i> ( <i>Soja hispida</i> )                                                                                         |
|                  | Peanut                                                                             | <i>Arachis hypogaea</i>                                                                                                            |
|                  | Sesame                                                                             | <i>Sesamum indicum</i>                                                                                                             |
|                  | Hake                                                                               | <i>Merluccius merluccius</i>                                                                                                       |
|                  | Trout                                                                              | <i>Salmo trutta fario</i>                                                                                                          |

|  |          |                           |
|--|----------|---------------------------|
|  | Hazelnut | <i>Corylus avellana</i>   |
|  | Walnut   | <i>Juglans spp.</i>       |
|  | Almond   | <i>Amygdalus communis</i> |
|  | Cacao    | <i>Theobroma cacao</i>    |
|  | Rice     | <i>Oryza sativa</i>       |
